# Supplementary material for: Efficient CO2catalytic hydrogenation over CuOx–ZnO/silicalite-1 with stable Cu+species
Source: Royal Society of Chemistry journal article supplement (doi:10.1039/d2cy01045c), 2022-01-01
Supplement: d2cy01045c1.pdf [file d2cy01045c1.pdf]

# Efficient CO<sub>2</sub> catalytic hydrogenation over CuO<sub>x</sub>- ZnO/ Silicalite-1 with stable Cu<sup>+</sup> species

Baorun Ma<sup>a</sup>, Hongxin Pan<sup>a</sup>, Fan Yang<sup>b</sup>, Xiaohui Liu<sup>a,\*</sup>, Yong Guo<sup>a</sup>, Yanqin Wang<sup>a,\*</sup>

<sup>a</sup> Shanghai Key Laboratory of Functional Materials Chemistry, Research Institute of Industrial Catalysis, School of Chemistry and Molecular Engineering, East China University of Science and Technology, Shanghai 200237, P. R. China.

<sup>b</sup> State Key Laboratory of Chemical Engineering, East China University of Science and Technology, Shanghai 200237, P. R. China.

\*Corresponding Author(s)

Email address: xhliu@ecust.edu.cn, wangyanqin@ecust.edu.cn

Tel: +86-21-64253824

Fax: +86-21-64253824

## Supplementary materials

### Figure and Table Captions

**Table S1.** Reaction performance of the catalysts at different temperature.

**Table S2.** Textural properties and elements content of various catalysts.

**Table S3.** Catalytic performance of the Cu-based/S-1 and 10Cu<sup>0</sup>/SiO<sub>2</sub> catalysts.

**Figure S1.** TEM image of the 10CuO/S-1.

**Figure S2.** TEM image of the 10CuO-2ZnO/S-1.

**Figure S3.** TEM image of the reduced 10CuO-2ZnO/S-1.

**Figure S4.** HAADF-STEM image of the (a1-a3) 10CuO/S-1 and (b1-b3) 10CuO-2ZnO/S-1.

**Figure S5.** X-ray photoelectron spectra of (a) Zn; (b) Zn L3M45M45 of reduced 10CuO-2ZnO/S-1.

**Figure S6.** H<sub>2</sub>-TPD of 2ZnO/S-1, 10CuO/S-1 and 10CuO-2ZnO/S-1.

**Figure S7.** In-situ CO<sub>2</sub>+H<sub>2</sub> DRIFT spectra at CO region of 10CuO-2ZnO/S-1 at 35 °C.

**Figure S8.** HAADF-STEM image and corresponding EDX elemental mapping spectra of the (a) 10CuO/S-1 and (b) 10CuO-2ZnO/S-1 after stream on time 100 h.

**Table S1.** Reaction performance of the catalysts at different temperature.

| Catalyst       | T<br>(°C) | Conversion<br>(%) | Selectivity (%) |                 |                 |                    | CO <sub>2</sub> Reaction<br>Rate/(mmol/g/h) |
|----------------|-----------|-------------------|-----------------|-----------------|-----------------|--------------------|---------------------------------------------|
|                |           |                   | CO              | CH <sub>4</sub> | C <sub>2+</sub> | CH <sub>3</sub> OH |                                             |
| 10CuO-2ZnO/S-1 | 200       | 0.8               | 93.0            | 7.0             | 0.0             | 0.00               | 0.17                                        |
|                | 250       | 7.5               | 88.0            | 2.6             | 0.0             | 9.4                | 1.87                                        |
|                | 300       | 17.9              | 94.0            | 3.3             | 0.4             | 2.4                | 4.48                                        |
| 10CuO/S-1      | 200       | --                | --              | --              | --              | --                 | --                                          |
|                | 250       | 2.5               | 93.1            | 6.9             | 0.0             | 0.00               | 0.62                                        |
|                | 300       | 10.6              | 91.1            | 8.7             | 0.0             | 0.2                | 2.65                                        |
| 2ZnO/S-1       | 200       | --                | --              | --              | --              | --                 | --                                          |
|                | 250       | 1.1               | 87.6            | 12.4            | 0.0             | 0.00               | 0.27                                        |
|                | 300       | 5.4               | 84.5            | 14.2            | 1.3             | 0.00               | 1.35                                        |
| 10ZnO/S-1      | 250       | 1.7               | 91.4            | 8.6             | 0.0             | 0.00               | 0.42                                        |
|                | 300       | 6.6               | 89.7            | 10.3            | 0.0             | 0.00               | 1.65                                        |
| S-1            | 250       | 0.8               | 96.7            | 3.3             | 0.0             | 0.00               | 0.19                                        |
|                | 300       | 5.3               | 89.5            | 10.5            | 0.0             | 0.00               | 1.34                                        |

**Reaction conditions: Pressure 3 MPa, Gas flow rate 90 mL/min 10%CO<sub>2</sub>/30%H<sub>2</sub>/60%N<sub>2</sub>, 0.9 g catalyst, WHSV=6000 mL/g<sub>cat</sub>/h.**

**Table S2.** Physicochemical properties of different catalysts.

| Catalyst            | Cu(wt.%) <sup>a</sup> | Zn(wt.%) <sup>a</sup> | S <sub>BET</sub> (m <sup>2</sup> /g) | D <sub>Cu</sub> (%) <sup>b</sup> |
|---------------------|-----------------------|-----------------------|--------------------------------------|----------------------------------|
| S-1                 | --                    | --                    | 420                                  | --                               |
| 2ZnO/S-1            | --                    | 1.7                   | 391                                  | --                               |
| 10CuO/S-1           | 8.6                   | --                    | 372                                  | 10.4                             |
| 10CuO-2ZnO/S-1      | 8.6                   | 1.4                   | 340                                  | 10.8                             |
| Used-10CuO-2ZnO/S-1 | 7.6                   | 0.9                   | 323                                  | --                               |

<sup>a</sup> Obtained from ICP-OES analysis.

<sup>b</sup> Through N<sub>2</sub>O chemisorption experiments, calculated method referred to reference<sup>1</sup>.

**Table S3.** Catalytic performance of the Cu-based/S-1 and 10Cu<sup>0</sup>/SiO<sub>2</sub> catalysts.

| Catalyst                                         | T<br>(°C) | Conversion<br>(%) | Selectivity (%)    |                 |                 |                    | Reaction Rate<br>(mmol/g/h) |
|--------------------------------------------------|-----------|-------------------|--------------------|-----------------|-----------------|--------------------|-----------------------------|
|                                                  |           |                   | CO/CO <sub>2</sub> | CH <sub>4</sub> | C <sub>2+</sub> | CH <sub>3</sub> OH |                             |
| 10CuO-2ZnO/S-1 <sup>a</sup>                      | 250       | 8.2               | 0.0                | 30.7            | 69.3            | 0                  | 4.69                        |
| 10CuO/S-1 <sup>a</sup>                           | 250       | 8.9               | 0.0                | 28.8            | 71.2            | 0                  | 5.28                        |
| 10Cu <sup>0</sup> /SiO <sub>2</sub> <sup>b</sup> | 250       | 1.4               | 67.8               | 21.9            | 1.2             | 9.1                | 0.36                        |

**Reaction conditions:** <sup>a</sup> Pressure 3MPa, Gas flow rate 30 mL/min 10%CO<sub>2</sub>/30%H<sub>2</sub>/60%N<sub>2</sub>, 0.3 g catalyst, WHSV=6000 mL/g<sub>cat</sub>/h. <sup>b</sup> Pressure 3MPa, Gas flow rate 30 mL/min 24%CO/72%H<sub>2</sub>/4%N<sub>2</sub>, 0.3 g catalyst, WHSV=6000 mL/g<sub>cat</sub>/h.

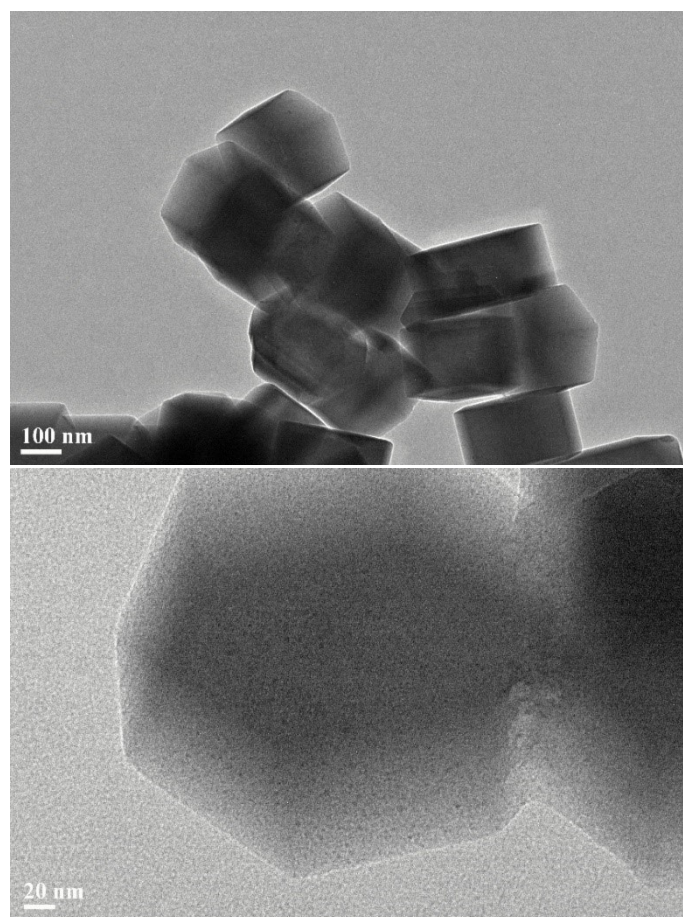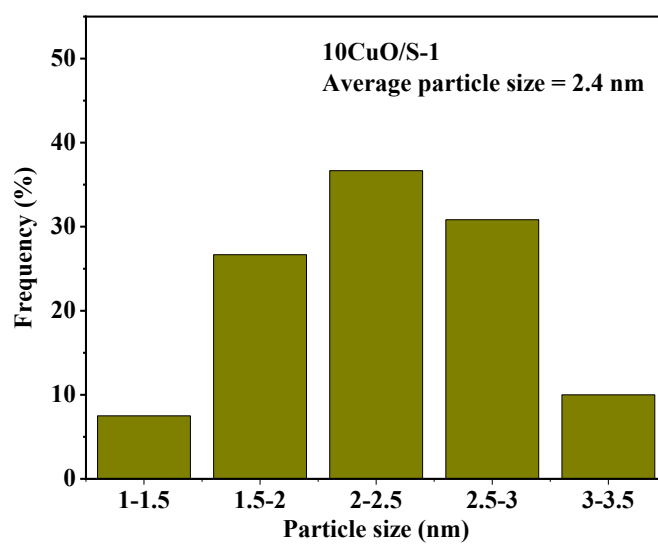

**Figure S1.** TEM image of the 10CuO/S-1.

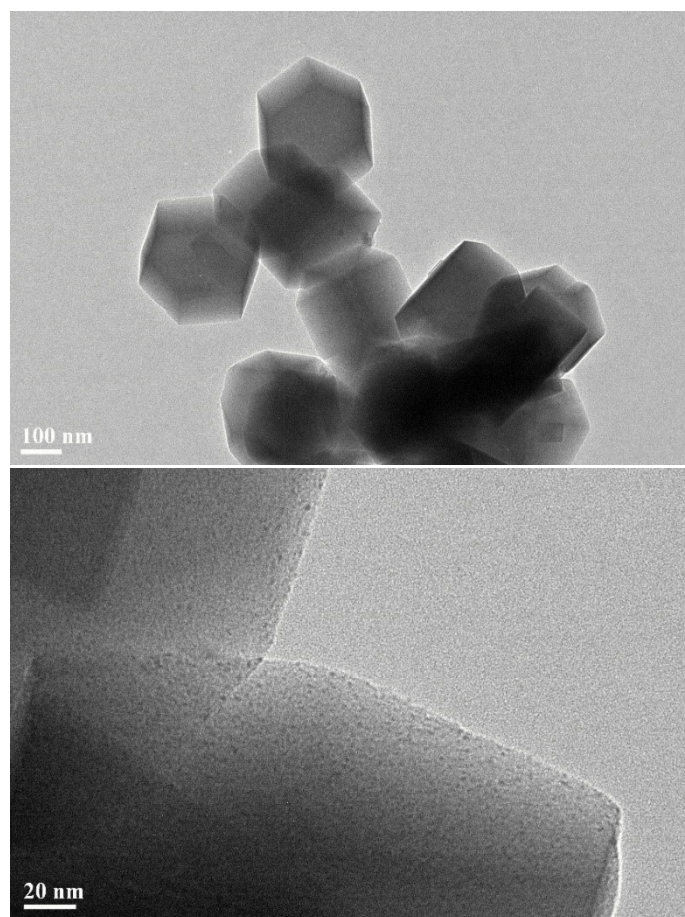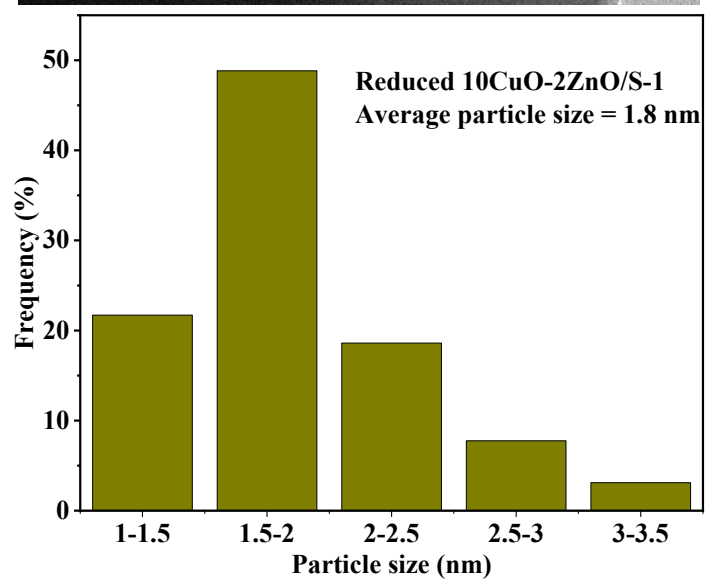

**Figure S2.** TEM image of the 10CuO-2ZnO/S-1.

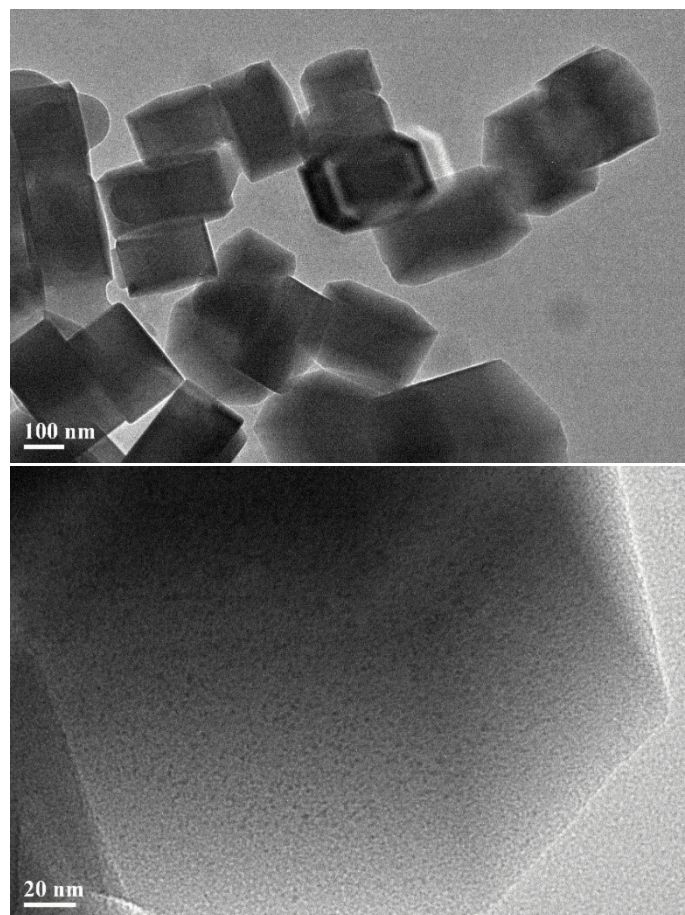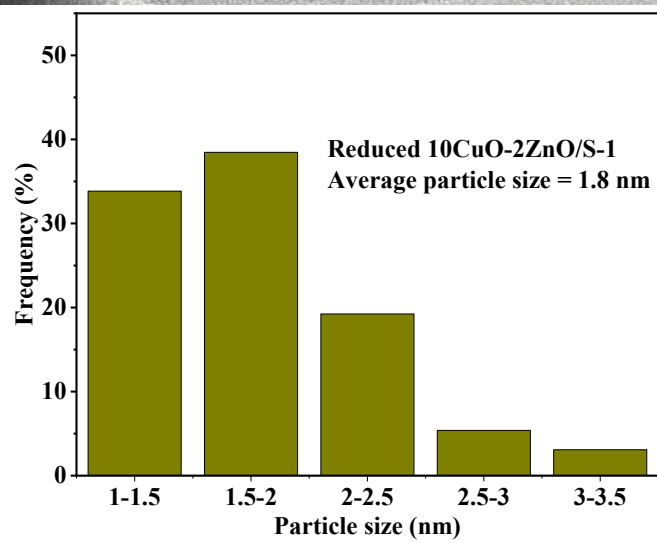

Figure S3. TEM image of the reduced 10CuO-2ZnO/S-1.

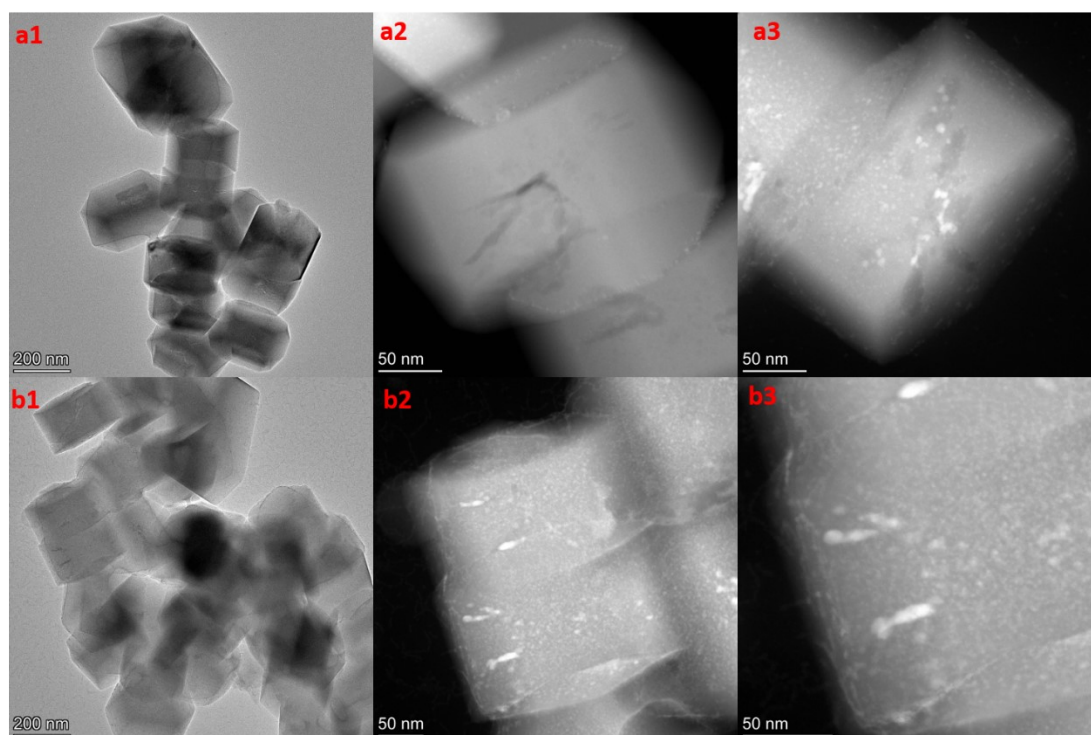

**Figure S4.** HAADF-STEM image of the (a1-a3) 10CuO/S-1 and (b1-b3) 10CuO-2ZnO/S-1.



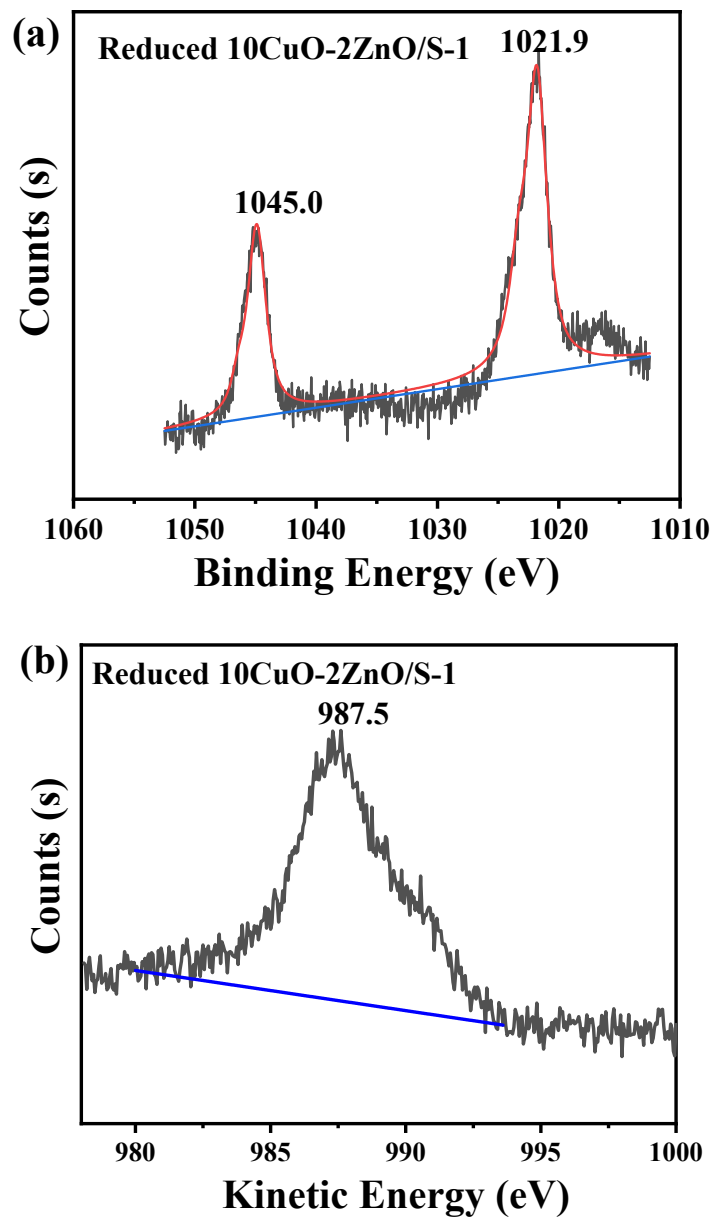

**Figure S5.** X-ray photoelectron spectra of (a) Zn; (b) Zn L3M45M45 of reduced 10CuO-2ZnO/S-1.

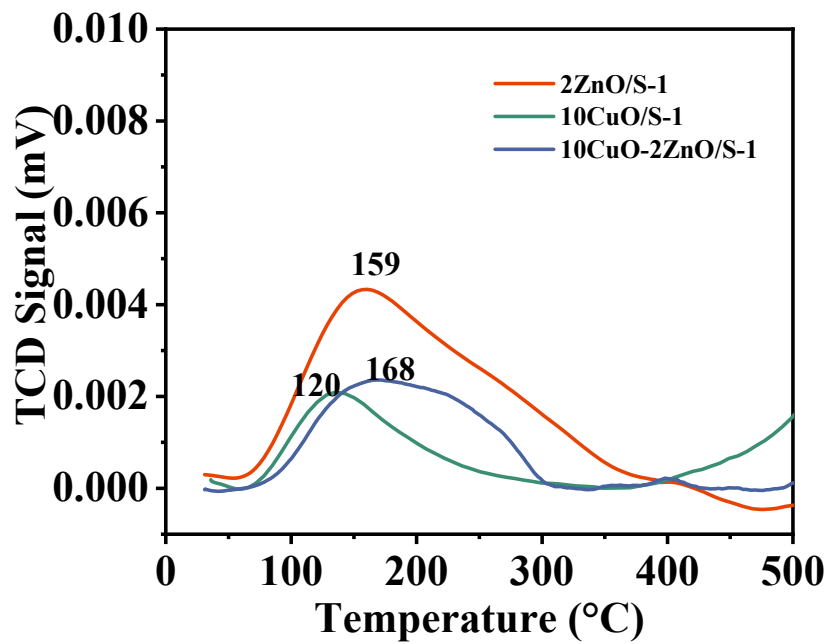

Figure S6. H<sub>2</sub>-TPD of 2ZnO/S-1, 10CuO/S-1 and 10CuO-2ZnO/S-1.

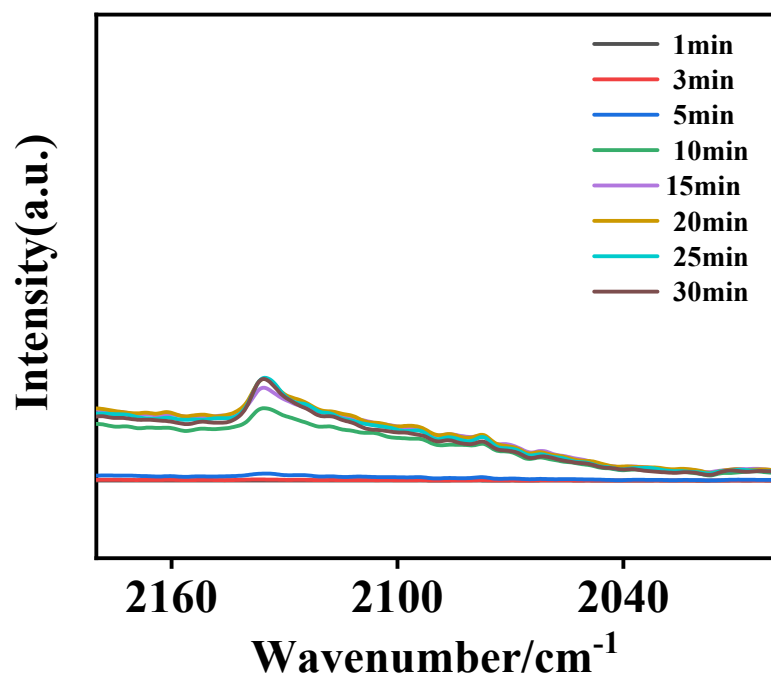

**Figure S7.** In-situ CO<sub>2</sub>+H<sub>2</sub> DRIFT spectra at CO region of 10CuO-2ZnO/S-1 at 35 °C.

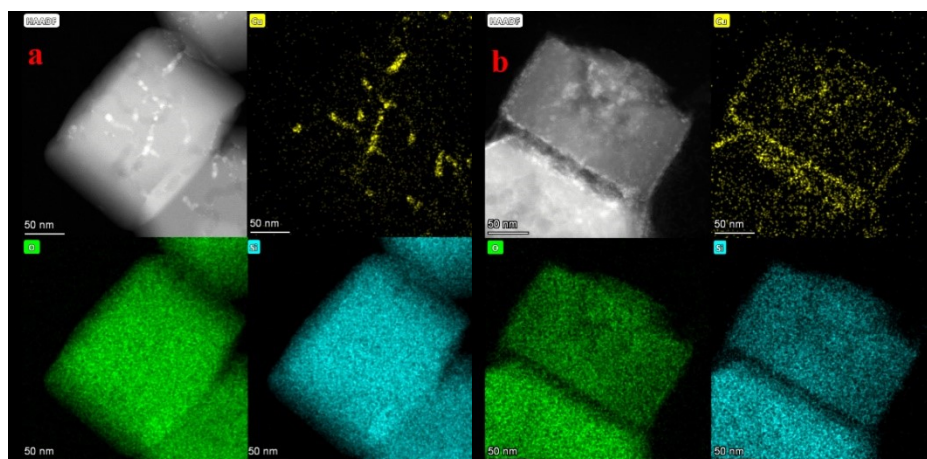

**Figure S8.** HAADF-STEM image and corresponding EDX elemental mapping spectra of the (a) 10CuO/S-1; (b) 10CuO-2ZnO/S-1 after reaction for 100 h.

**References :**

1. Chinchén, G. C.; Hay, C. M.; Vandervell, H. D.; Waugh, K. C., The measurement of copper surface areas by reactive frontal chromatography. *J. Catal.* **1987**, *103* (1), 79-86.
